# Supplementary material
Source: PubMed Central journal article supplement (PMC6173196)
Supplement: NIHMS1500714-supplement-1.pdf [file NIHMS1500714-supplement-1.pdf]

## **SUPPLEMENTAL VIDEO LEGEND**

**Supplemental Video 1.** *Mechanism of the IL-2 conformational transition between its antibody-bound and receptor-bound states.* Molecular dynamics simulations revealed multiple transition events in which free IL-2 adopting a JES6-1-bound state relaxed to a state resembling the IL-2R $\alpha$ -bound conformation (*top*). Time courses for selected root mean square deviation (RMSD), inter-residue distances, and residue-specific dihedral angles of the interhelical loops and flanking residues of IL-2 are presented (*bottom*).
